# Supplementary material
Source: PubMed Central journal article supplement (PMC4645329)
Supplement: JVI.01757-15_zjv999091026so1.pdf [file JVI.01757-15_zjv999091026so1.pdf]

1 **Modulation of the microRNA cluster miR-183-96-182 expression by the Epstein-Barr**  
2 **virus latent membrane protein 1**

3

4 Lassad Oussaief<sup>1</sup>, Ali Fendri<sup>2</sup>, Béatrice Chane-Woon-Ming<sup>2</sup>, Remy Poirey<sup>3</sup>, Henri-Jacques  
5 Delecluse<sup>3</sup>, Irène Joab<sup>1</sup>, and Sébastien Pfeffer<sup>2</sup>

6

7

8 **Supplemental material**

9

10 **Table S1**

11 Repartition of EBV miRNAs in all libraries.

12

13 **Table S1.** Repartition of EBV miRNAs in all libraries. Norm. RC, normalized read count (per  
 14  $10^5$  miRNA reads)  
 15

|                             | Mutu-I<br>0h              | Mutu-I<br>2h              | Mutu-I<br>24h             | Kem-I<br>0h               | Kem-I<br>2h               | Kem-I<br>24h              | Sav*<br>0h                | Sav*<br>2h                | Sav*<br>24h               |
|-----------------------------|---------------------------|---------------------------|---------------------------|---------------------------|---------------------------|---------------------------|---------------------------|---------------------------|---------------------------|
| miRNA                       | <i>norm.</i><br><i>RC</i> |
| miR-BART1-3p                | 88.86                     | 71.62                     | 151.82                    | 164.54                    | 165.39                    | 120.13                    | 2.19                      | 2.44                      | 1.75                      |
| miR-BART1-5p                | 424.88                    | 347.66                    | 541.05                    | 1063.33                   | 1938.13                   | 454.15                    | 33.82                     | 9.59                      | 19.34                     |
| miR-BART10                  | 1606.85                   | 1668.63                   | 1564.76                   | 1635.81                   | 1748.70                   | 882.44                    | 25.31                     | 14.94                     | 22.94                     |
| miR-BART10*                 | 13.74                     | 8.99                      | 14.26                     | 5.15                      | 7.11                      | 3.16                      | 0.00                      | 0.01                      | 0.07                      |
| miR-BART11-3p               | 545.63                    | 418.72                    | 728.49                    | 1127.07                   | 1870.74                   | 955.15                    | 24.51                     | 13.02                     | 17.82                     |
| miR-BART11-5p               | 80.21                     | 64.36                     | 98.71                     | 171.15                    | 179.47                    | 152.09                    | 2.61                      | 1.13                      | 1.59                      |
| miR-BART12                  | 370.71                    | 294.06                    | 306.49                    | 253.81                    | 546.44                    | 455.12                    | 2.94                      | 1.96                      | 2.51                      |
| miR-BART13                  | 84.32                     | 103.92                    | 138.89                    | 133.52                    | 133.97                    | 47.55                     | 3.64                      | 1.15                      | 2.97                      |
| miR-BART13*                 | 32.78                     | 30.18                     | 30.78                     | 599.01                    | 948.21                    | 969.92                    | 1.58                      | 6.00                      | 9.29                      |
| miR-BART14                  | 542.75                    | 446.69                    | 520.97                    | 1574.34                   | 2375.28                   | 708.82                    | 32.82                     | 10.17                     | 19.55                     |
| miR-BART14*                 | 9.40                      | 9.19                      | 11.25                     | 6.68                      | 15.52                     | 10.16                     | 0.35                      | 0.16                      | 0.20                      |
| miR-BART15                  | 188.21                    | 125.88                    | 189.98                    | 207.81                    | 157.48                    | 337.56                    | 10.46                     | 3.66                      | 1.43                      |
| miR-BART16                  | 4161.82                   | 3383.64                   | 3416.69                   | 3935.67                   | 3836.01                   | 3224.45                   | 48.92                     | 74.28                     | 51.60                     |
| miR-BART17-3p               | 97.12                     | 95.30                     | 94.12                     | 105.23                    | 131.81                    | 83.89                     | 0.79                      | 0.84                      | 0.67                      |
| miR-BART17-5p               | 4.18                      | 5.77                      | 11.55                     | 126.14                    | 52.97                     | 48.57                     | 2.82                      | 0.64                      | 0.95                      |
| miR-BART18-3p               | 417.57                    | 327.66                    | 372.97                    | 240.05                    | 323.98                    | 209.34                    | 4.56                      | 3.45                      | 3.12                      |
| miR-BART18-5p               | 109.89                    | 87.78                     | 133.91                    | 47.80                     | 42.21                     | 31.07                     | 1.90                      | 0.45                      | 1.56                      |
| miR-BART19-3p               | 2547.45                   | 1408.81                   | 1062.83                   | 1958.66                   | 2526.74                   | 2499.48                   | 42.69                     | 28.63                     | 23.15                     |
| miR-BART19-5p               | 58.46                     | 76.03                     | 121.41                    | 148.37                    | 193.28                    | 113.09                    | 1.63                      | 0.42                      | 0.56                      |
| miR-BART2-3p                | 63.84                     | 49.58                     | 41.26                     | 146.90                    | 237.56                    | 108.71                    | 1.52                      | 1.39                      | 1.45                      |
| miR-BART2-5p                | 89.41                     | 81.72                     | 156.31                    | 85.68                     | 124.61                    | 75.76                     | 2.45                      | 1.30                      | 2.60                      |
| miR-BART20-3p               | 3.33                      | 2.99                      | 2.75                      | 9.52                      | 10.00                     | 4.01                      | 0.00                      | 0.02                      | 0.21                      |
| miR-BART20-5p               | 1.26                      | 0.95                      | 1.24                      | 8.30                      | 13.83                     | 3.38                      | 0.29                      | 0.19                      | 0.07                      |
| miR-BART21-3p               | 72.59                     | 65.72                     | 55.34                     | 18.42                     | 29.85                     | 16.16                     | 0.19                      | 0.34                      | 0.26                      |
| miR-BART21-5p               | 30.81                     | 22.14                     | 28.69                     | 39.17                     | 66.59                     | 8.87                      | 2.28                      | 0.30                      | 0.85                      |
| miR-BART22                  | 4561.29                   | 4592.25                   | 2349.21                   | 2021.08                   | 1313.87                   | 1052.09                   | 50.71                     | 51.96                     | 36.39                     |
| miR-BART3                   | 39.89                     | 32.86                     | 72.63                     | 35.83                     | 40.01                     | 32.25                     | 0.38                      | 0.46                      | 0.20                      |
| miR-BART3*                  | 49.99                     | 41.73                     | 41.04                     | 101.06                    | 96.98                     | 76.25                     | 1.27                      | 1.25                      | 1.30                      |
| miR-BART4                   | 266.76                    | 171.99                    | 195.66                    | 106.07                    | 172.24                    | 301.80                    | 1.84                      | 2.00                      | 1.02                      |
| miR-BART4*                  | 94.83                     | 103.24                    | 119.51                    | 101.14                    | 122.54                    | 80.19                     | 0.62                      | 0.56                      | 0.37                      |
| miR-BART5                   | 225.76                    | 298.28                    | 338.82                    | 208.91                    | 181.58                    | 159.68                    | 1.59                      | 1.94                      | 2.17                      |
| miR-BART5*                  | 2.79                      | 5.57                      | 4.82                      | 1.47                      | 2.53                      | 1.61                      | 0.03                      | 0.00                      | 0.02                      |
| miR-BART6-3p                | 4129.33                   | 2796.68                   | 3253.82                   | 12856.70                  | 8660.80                   | 18489.40                  | 138.77                    | 159.82                    | 57.48                     |
| miR-BART6-5p                | 199.59                    | 206.75                    | 164.95                    | 421.91                    | 345.28                    | 379.75                    | 5.06                      | 4.40                      | 3.96                      |
| miR-BART7                   | 1091.89                   | 1099.62                   | 1724.03                   | 2957.64                   | 3536.97                   | 1577.91                   | 47.69                     | 23.82                     | 42.10                     |
| miR-BART7*                  | 120.71                    | 126.25                    | 462.53                    | 601.98                    | 607.87                    | 1164.88                   | 7.00                      | 7.37                      | 2.45                      |
| miR-BART8                   | 1503.54                   | 1349.93                   | 1527.96                   | 1699.40                   | 2350.29                   | 1034.09                   | 47.71                     | 17.08                     | 38.21                     |
| miR-BART8*                  | 11102.80                  | 11159.10                  | 12485.50                  | 8947.41                   | 7018.20                   | 17171.00                  | 198.72                    | 200.58                    | 115.44                    |
| miR-BART9                   | 1774.26                   | 1702.54                   | 1841.93                   | 995.53                    | 1024.75                   | 873.09                    | 26.88                     | 16.53                     | 29.35                     |
| miR-BART9*                  | 523.84                    | 517.40                    | 470.90                    | 748.86                    | 479.93                    | 1247.34                   | 9.95                      | 9.13                      | 4.39                      |
| <b>Total miR BART</b>       | <b>37333.36</b>           | <b>33402.19</b>           | <b>34849.82</b>           | <b>45617.11</b>           | <b>43629.71</b>           | <b>55164.36</b>           | <b>788.46</b>             | <b>673.36</b>             | <b>521.36</b>             |
| miR-BHRF1-1                 | 1289.63                   | 1843.94                   | 2259.78                   | 541.73                    | 326.67                    | 1071.07                   | 2846.67                   | 5762.58                   | 4121.82                   |
| miR-BHRF1-2                 | 106.54                    | 93.49                     | 124.81                    | 30.47                     | 59.03                     | 16.39                     | 1497.97                   | 379.19                    | 674.95                    |
| miR-BHRF1-2*                | 4.70                      | 7.77                      | 8.28                      | 2.89                      | 1.60                      | 1.83                      | 60.26                     | 13.04                     | 34.36                     |
| miR-BHRF1-3                 | 868.02                    | 881.70                    | 1658.40                   | 96.06                     | 179.60                    | 56.43                     | 1.73                      | 1.14                      | 2.64                      |
| <b>Total miR BHRF1</b>      | <b>2268.89</b>            | <b>2826.90</b>            | <b>4051.27</b>            | <b>671.15</b>             | <b>566.90</b>             | <b>1145.72</b>            | <b>4406.63</b>            | <b>6155.95</b>            | <b>4833.77</b>            |
| <b>Ratio<br/>BART/BHRF1</b> | <b>16.45</b>              | <b>11.82</b>              | <b>8.60</b>               | <b>67.97</b>              | <b>76.96</b>              | <b>48.15</b>              | <b>0.18</b>               | <b>0.11</b>               | <b>0.11</b>               |
